# Supplementary material for: Diagnóstico de las paresias motoras oculares
Source: MDPI journal article supplement (doi:10.3390/md20090541), 1967-01-01
Supplement: s1 [file s1]

**Chart S1.** Chemical structures of the aphidicolin compounds studied in this work.

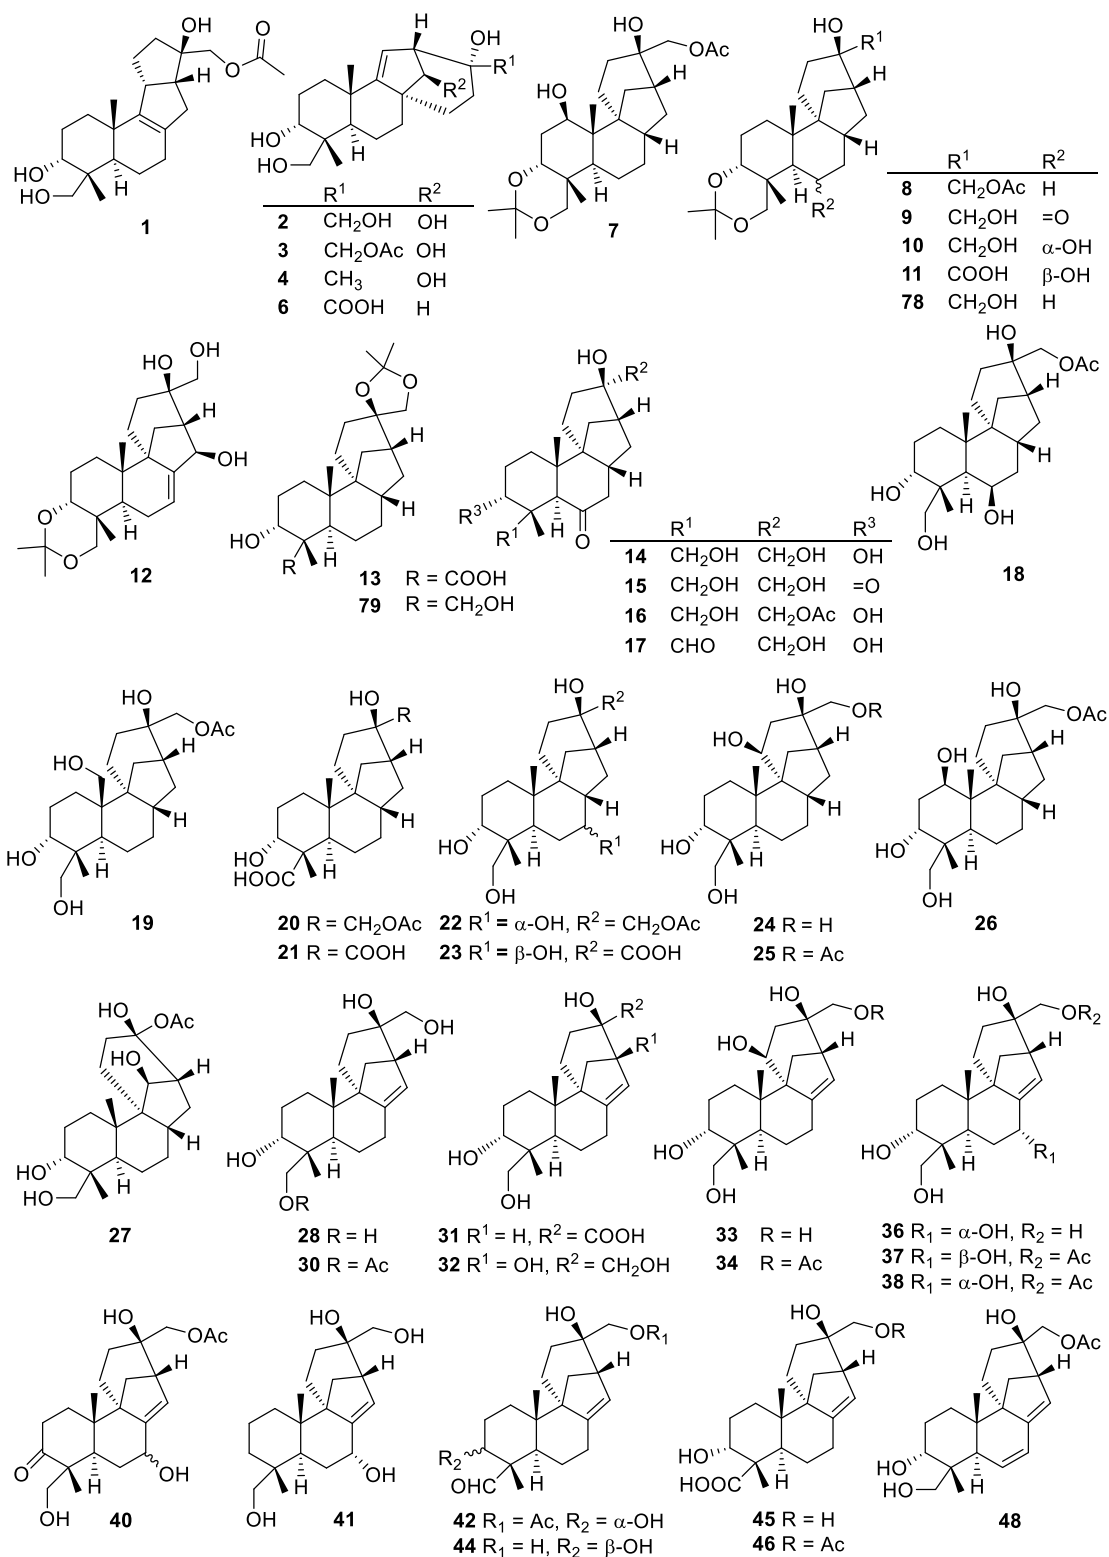

**Chart S1.** (*cont.*)

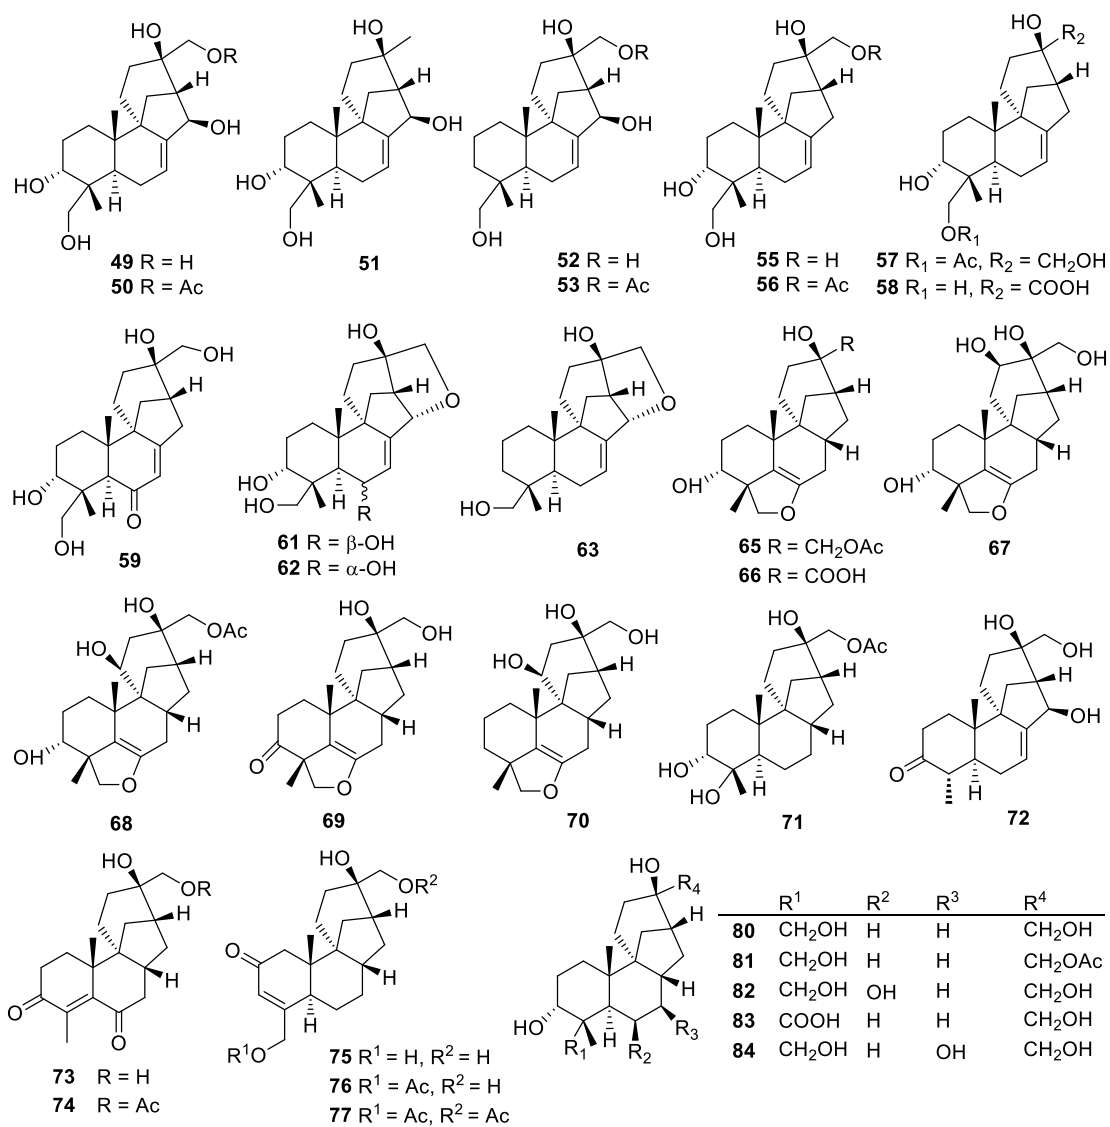

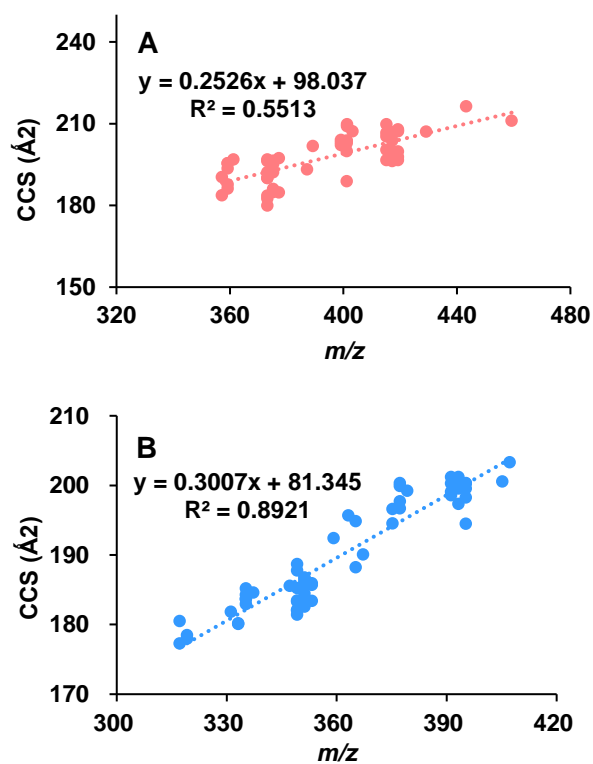

**Figure S1.** Correlation between the TWIMS-derived nitrogen collision cross-sections (CCSs) and  $m/z$  for a series of aphidicolin compounds when detected as sodium adducts (A) and deprotonated molecules (B).

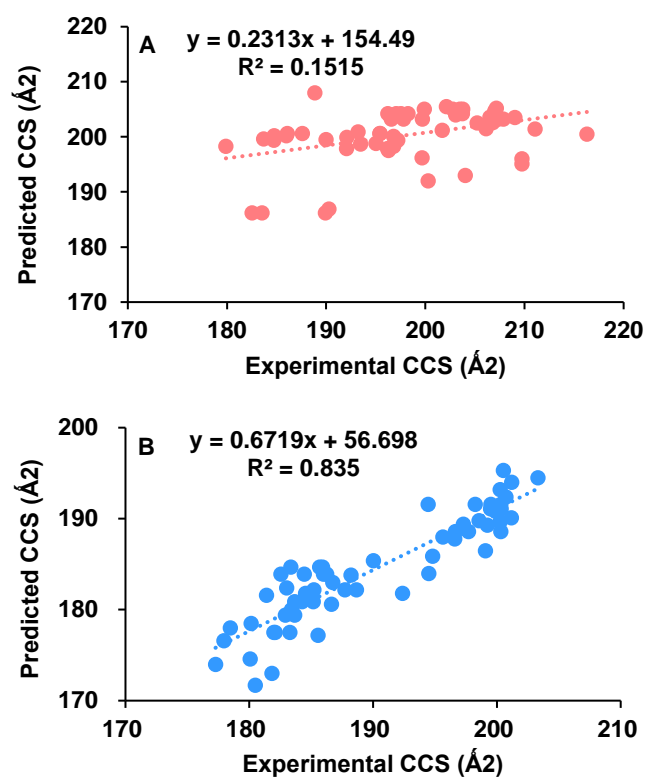

**Figure S2.** Predicted CCSs using CCSbase<sup>1</sup> for sodium adducts (A) and deprotonated molecules (B) of aphidicolin compounds as a function of experimental CCSs.

**Table S1.** Collision cross-section (CCS) reference values in nitrogen used for the instrument CCS calibration under positive ( $[M+H]^+$ ) and negative ( $[M-H]^-$ ) ionization modes.

| Compound                                 | Formula                                                         | Adduct type | Theoretical $m/z$ <sup>a</sup> | CCS   |
|------------------------------------------|-----------------------------------------------------------------|-------------|--------------------------------|-------|
| Acetaminophen                            | C <sub>8</sub> H <sub>9</sub> NO <sub>2</sub>                   | $[M+H]^+$   | 152.07061                      | 130.4 |
| Reserpine fragment                       | C <sub>8</sub> H <sub>10</sub> N <sub>4</sub> O <sub>2</sub>    | $[M+H]^+$   | 195.08765                      | 138.2 |
| Sulfaguanidine                           | C <sub>7</sub> H <sub>10</sub> N <sub>4</sub> O <sub>2</sub> S  | $[M+H]^+$   | 215.05972                      | 146.8 |
| Sulfadimethoxine                         | C <sub>12</sub> H <sub>14</sub> N <sub>4</sub> O <sub>4</sub> S | $[M+H]^+$   | 311.08085                      | 168.4 |
| Val-Tyr-Val                              | C <sub>19</sub> H <sub>29</sub> N <sub>3</sub> O <sub>5</sub>   | $[M+H]^+$   | 380.21800                      | 191.7 |
| Verapamil                                | C <sub>27</sub> H <sub>38</sub> N <sub>2</sub> O <sub>4</sub>   | $[M+H]^+$   | 455.29043                      | 208.8 |
| Terfenadine                              | C <sub>32</sub> H <sub>41</sub> NO <sub>2</sub>                 | $[M+H]^+$   | 472.32101                      | 228.7 |
| Polyalanine, n=7                         | C <sub>21</sub> H <sub>37</sub> N <sub>7</sub> O <sub>8</sub>   | $[M+H]^+$   | 516.27764                      | 211.0 |
| Leucine Enkephalin                       | C <sub>28</sub> H <sub>37</sub> N <sub>5</sub> O <sub>7</sub>   | $[M+H]^+$   | 556.27658                      | 229.8 |
| Polyalanine, n=8                         | C <sub>24</sub> H <sub>42</sub> N <sub>8</sub> O <sub>9</sub>   | $[M+H]^+$   | 587.31475                      | 228.0 |
| Reserpine                                | C <sub>33</sub> H <sub>40</sub> N <sub>2</sub> O <sub>9</sub>   | $[M+H]^+$   | 609.28066                      | 252.3 |
| Polyalanine, n=9                         | C <sub>27</sub> H <sub>47</sub> N <sub>9</sub> O <sub>10</sub>  | $[M+H]^+$   | 658.35187                      | 243.0 |
| Polyalanine, n=10                        | C <sub>30</sub> H <sub>52</sub> N <sub>10</sub> O <sub>11</sub> | $[M+H]^+$   | 729.38898                      | 256.0 |
| Polyalanine, n=11                        | C <sub>33</sub> H <sub>57</sub> N <sub>11</sub> O <sub>12</sub> | $[M+H]^+$   | 800.42609                      | 271.0 |
| Polyalanine, n=12                        | C <sub>36</sub> H <sub>62</sub> N <sub>12</sub> O <sub>13</sub> | $[M+H]^+$   | 871.46321                      | 282.0 |
| Polyalanine, n=13                        | C <sub>39</sub> H <sub>67</sub> N <sub>13</sub> O <sub>14</sub> | $[M+H]^+$   | 942.50032                      | 294.0 |
| Acetaminophen                            | C <sub>8</sub> H <sub>9</sub> NO <sub>2</sub>                   | $[M-H]^-$   | 150.05605                      | 131.5 |
| Theophylline                             | C <sub>7</sub> H <sub>7</sub> N <sub>4</sub> O <sub>2</sub>     | $[M-H]^-$   | 179.05745                      | 132.4 |
| Sulfaguanidine                           | C <sub>7</sub> H <sub>10</sub> N <sub>4</sub> O <sub>2</sub> S  | $[M-H]^-$   | 213.04517                      | 145.2 |
| Sulfadimethoxine                         | C <sub>12</sub> H <sub>14</sub> N <sub>4</sub> O <sub>4</sub> S | $[M-H]^-$   | 309.06630                      | 170.1 |
| Val-Tyr-Val                              | C <sub>19</sub> H <sub>29</sub> N <sub>3</sub> O <sub>5</sub>   | $[M-H]^-$   | 378.20344                      | 192.5 |
| Leucine Enkephalin                       | C <sub>28</sub> H <sub>37</sub> N <sub>5</sub> O <sub>7</sub>   | $[M-H]^-$   | 554.26202                      | 225.3 |
| Perfluoroheptanoic acid -CO <sub>2</sub> | C <sub>6</sub> F <sub>13</sub>                                  | $[M-H]^-$   | 318.97979                      | 130.1 |
| Perfluorooctanoic acid -CO <sub>2</sub>  | C <sub>7</sub> F <sub>15</sub>                                  | $[M-H]^-$   | 368.97660                      | 137.2 |
| Polyalanine, n=8                         | C <sub>24</sub> H <sub>42</sub> N <sub>8</sub> O <sub>9</sub>   | $[M-H]^-$   | 585.30020                      | 227.7 |
| Reserpine                                | C <sub>33</sub> H <sub>40</sub> N <sub>2</sub> O <sub>9</sub>   | $[M-H]^-$   | 607.26610                      | 265.2 |
| Polyalanine, n=9                         | C <sub>27</sub> H <sub>47</sub> N <sub>9</sub> O <sub>10</sub>  | $[M-H]^-$   | 656.33731                      | 242.1 |
| Polyalanine, n=10                        | C <sub>30</sub> H <sub>52</sub> N <sub>10</sub> O <sub>11</sub> | $[M-H]^-$   | 727.37443                      | 255.9 |
| Polyalanine, n=11                        | C <sub>33</sub> H <sub>57</sub> N <sub>11</sub> O <sub>12</sub> | $[M-H]^-$   | 798.41154                      | 268.5 |
| Polyalanine, n=12                        | C <sub>36</sub> H <sub>62</sub> N <sub>12</sub> O <sub>13</sub> | $[M-H]^-$   | 869.44865                      | 280.2 |
| Polyalanine, n=13                        | C <sub>39</sub> H <sub>67</sub> N <sub>13</sub> O <sub>14</sub> | $[M-H]^-$   | 940.48577                      | 294.6 |

<sup>a</sup> The theoretical  $m/z$  are given as neutral species, i.e. the mass of an electron was not accounted for.

**Table S2.** The inter-day precision evaluation for compound **36** under positive ionization mode.

| No. <sup>a</sup>       | Molecular<br>formula                           | Monoisotopic<br>mass | Observed<br>RT <sup>b</sup> (min) | [M+Na] <sup>+</sup>                    |                                   | [2M+Na] <sup>+</sup>                   |                                   |
|------------------------|------------------------------------------------|----------------------|-----------------------------------|----------------------------------------|-----------------------------------|----------------------------------------|-----------------------------------|
|                        |                                                |                      |                                   | Theoretical<br><i>m/z</i> <sup>c</sup> | Observed<br>CCS (Å <sup>2</sup> ) | Theoretical<br><i>m/z</i> <sup>c</sup> | Observed<br>CCS (Å <sup>2</sup> ) |
| <b>36</b>              | C <sub>20</sub> H <sub>32</sub> O <sub>5</sub> | 352.2250             | 3.38                              | 375.2148                               | 186.00                            | 727.4398                               | 248.82                            |
|                        |                                                |                      | 3.32                              |                                        | 186.24                            |                                        | 250.01                            |
|                        |                                                |                      | 3.37                              |                                        | 185.84                            |                                        | 249.55                            |
|                        |                                                |                      | 3.35                              |                                        | 185.43                            |                                        | 249.60                            |
|                        |                                                |                      | 3.34                              |                                        | 185.61                            |                                        | 248.62                            |
|                        |                                                |                      | 3.35                              |                                        | 185.81                            |                                        | 248.25                            |
|                        |                                                |                      | 3.35                              |                                        | 185.55                            |                                        | 248.69                            |
| Standard<br>deviations | -                                              | -                    | 0.02                              | -                                      | 0.28                              | -                                      | 0.64                              |

<sup>a</sup> The numbering of compounds was consistent with Chart S1.<sup>b</sup> RT, retention time.<sup>c</sup> The theoretical *m/z* are given as neutral species, i.e. the mass of an electron was not subtracted.

**Table S3.** Chromatographic, mass spectrometric, and ion mobility spectrometric information under positive ionization mode for aphidicolin compounds.

| No. <sup>a</sup> | Molecular formula                              | Monoisotopic mass | Observed RT (min) | [M+Na] <sup>+</sup>            |                                | [2M+Na] <sup>+</sup>           |                                |
|------------------|------------------------------------------------|-------------------|-------------------|--------------------------------|--------------------------------|--------------------------------|--------------------------------|
|                  |                                                |                   |                   | Theoretical $m/z$ <sup>b</sup> | Observed CCS (Å <sup>2</sup> ) | Theoretical $m/z$ <sup>b</sup> | Observed CCS (Å <sup>2</sup> ) |
| <b>1</b>         | C <sub>22</sub> H <sub>34</sub> O <sub>5</sub> | 378.2406          | 4.27              | 401.2304                       | 188.86                         | -                              | -                              |
| <b>3</b>         | C <sub>22</sub> H <sub>34</sub> O <sub>6</sub> | 394.2355          | 3.14              | 417.2253                       | 203.73                         | 811.4608                       | 279.02                         |
| <b>7</b>         | C <sub>25</sub> H <sub>40</sub> O <sub>6</sub> | 436.2825          | 4.93              | 459.2723                       | 211.07                         | 895.5548                       | 301.43                         |
| <b>8</b>         | C <sub>25</sub> H <sub>40</sub> O <sub>5</sub> | 420.2876          | 6.19              | 443.2774                       | 216.29                         | 863.5650                       | 304.19                         |
| <b>10</b>        | C <sub>23</sub> H <sub>38</sub> O <sub>5</sub> | 394.2719          | 3.92              | 417.2617                       | 199.66                         | 811.5336                       | 277.49                         |
| <b>12</b>        | C <sub>23</sub> H <sub>36</sub> O <sub>5</sub> | 392.2563          | 3.98              | 415.2461                       | 209.75                         | 807.5024                       | 303.89                         |
| <b>13</b>        | C <sub>23</sub> H <sub>36</sub> O <sub>5</sub> | 392.2563          | 5.01              | 415.2461                       | 206.52                         | 807.5024                       | 274.79                         |
| <b>14</b>        | C <sub>20</sub> H <sub>32</sub> O <sub>5</sub> | 352.225           | 3.32              | 375.2148                       | 195.01                         | 727.4398                       | 264.27                         |
| <b>15</b>        | C <sub>20</sub> H <sub>30</sub> O <sub>5</sub> | 350.2093          | 3.22              | 373.1991                       | 196.19                         | 723.4084                       | 266.19                         |
| <b>16</b>        | C <sub>22</sub> H <sub>34</sub> O <sub>6</sub> | 394.2355          | 3.82              | 417.2253                       | 206.80                         | 811.4608                       | 259.06                         |
| <b>17</b>        | C <sub>20</sub> H <sub>30</sub> O <sub>5</sub> | 350.2093          | 3.37              | 373.1991                       | 192.05                         | 723.4084                       | 274.83                         |
| <b>18</b>        | C <sub>22</sub> H <sub>36</sub> O <sub>6</sub> | 396.2512          | 3.49              | 419.241                        | 207.35                         | 815.4922                       | 278.59                         |
| <b>19</b>        | C <sub>22</sub> H <sub>36</sub> O <sub>6</sub> | 396.2512          | 3.31              | 419.241                        | 207.18                         | 815.4922                       | 280.25                         |
| <b>20</b>        | C <sub>22</sub> H <sub>34</sub> O <sub>6</sub> | 394.2355          | 4.48              | 417.2253                       | 206.14                         | 811.4608                       | 271.57                         |
| <b>22</b>        | C <sub>22</sub> H <sub>36</sub> O <sub>6</sub> | 396.2512          | 3.95              | 419.241                        | 196.56                         | 815.4922                       | 262.12                         |
| <b>24</b>        | C <sub>20</sub> H <sub>34</sub> O <sub>5</sub> | 354.2406          | 3.88              | 377.2304                       | 184.74                         | 731.4710                       | 258.38                         |
| <b>25</b>        | C <sub>22</sub> H <sub>36</sub> O <sub>6</sub> | 396.2512          | 4.39              | 419.241                        | 197.80                         | 815.4922                       | 272.44                         |
| <b>26</b>        | C <sub>22</sub> H <sub>34</sub> O <sub>7</sub> | 396.2512          | 3.82              | 419.241                        | 199.72                         | 815.4922                       | 270.59                         |
| <b>27</b>        | C <sub>22</sub> H <sub>36</sub> O <sub>6</sub> | 396.2512          | 3.56              | 419.241                        | 207.86                         | 815.4922                       | 277.78                         |
| <b>28</b>        | C <sub>20</sub> H <sub>32</sub> O <sub>4</sub> | 336.2301          | 3.83              | 359.2199                       | 187.61                         | 695.4500                       | 262.05                         |
| <b>30</b>        | C <sub>21</sub> H <sub>32</sub> O <sub>5</sub> | 378.2406          | 4.29              | 401.2304                       | 203.49                         | 779.4710                       | 275.49                         |
| <b>31</b>        | C <sub>20</sub> H <sub>30</sub> O <sub>5</sub> | 350.2093          | 3.81              | 373.1991                       | 179.88                         | 723.4084                       | 246.54                         |
| <b>32</b>        | C <sub>20</sub> H <sub>32</sub> O <sub>5</sub> | 352.225           | 3.29              | 375.2148                       | 192.1                          | 727.4398                       | 289.85                         |
| <b>33</b>        | C <sub>20</sub> H <sub>32</sub> O <sub>5</sub> | 352.225           | 3.65              | 375.2148                       | 184.77                         | 727.4398                       | 258.46                         |
| <b>34</b>        | C <sub>22</sub> H <sub>34</sub> O <sub>6</sub> | 394.2355          | 4.28              | 417.2253                       | 198.25                         | 811.4608                       | 279.08                         |
| <b>36</b>        | C <sub>20</sub> H <sub>32</sub> O <sub>5</sub> | 352.225           | 3.38              | 375.2148                       | 186.00                         | 727.4398                       | 248.82                         |
| <b>37</b>        | C <sub>22</sub> H <sub>34</sub> O <sub>6</sub> | 394.2355          | 3.21              | 417.2253                       | 197.53                         | 811.4608                       | 268.24                         |
| <b>38</b>        | C <sub>22</sub> H <sub>34</sub> O <sub>6</sub> | 394.2355          | 3.82              | 417.2253                       | 196.22                         | 811.4608                       | 262.26                         |
| <b>40</b>        | C <sub>22</sub> H <sub>32</sub> O <sub>6</sub> | 392.2199          | 3.41              | 415.2097                       | 196.53                         | 807.4296                       | 265.81                         |
| <b>41</b>        | C <sub>20</sub> H <sub>32</sub> O <sub>4</sub> | 336.2301          | 3.80              | 359.2199                       | 186.07                         | 695.4500                       | 254.44                         |

**Table S3.** (*cont.*)

|           |                                                |          |      |          |        |          |        |
|-----------|------------------------------------------------|----------|------|----------|--------|----------|--------|
| <b>42</b> | C <sub>22</sub> H <sub>32</sub> O <sub>5</sub> | 376.225  | 4.48 | 399.2148 | 203.07 | 775.4398 | 273.48 |
| <b>44</b> | C <sub>20</sub> H <sub>30</sub> O <sub>4</sub> | 334.2144 | 3.57 | 357.2042 | 183.70 | -        | -      |
| <b>45</b> | C <sub>20</sub> H <sub>30</sub> O <sub>5</sub> | 350.2093 | 3.54 | 373.1991 | 196.79 | 723.4084 | 257.95 |
| <b>46</b> | C <sub>22</sub> H <sub>32</sub> O <sub>6</sub> | 392.2199 | 4.08 | 415.2097 | 205.21 | 807.4296 | 275.08 |
| <b>48</b> | C <sub>22</sub> H <sub>32</sub> O <sub>5</sub> | 376.225  | 4.30 | 399.2148 | 202.13 | 775.4398 | 276.42 |
| <b>50</b> | C <sub>22</sub> H <sub>34</sub> O <sub>6</sub> | 394.2355 | 3.05 | 417.2253 | 197.06 | -        | -      |
| <b>51</b> | C <sub>20</sub> H <sub>32</sub> O <sub>4</sub> | 336.2301 | 3.02 | 359.2199 | 193.46 | 695.4500 | 261.13 |
| <b>52</b> | C <sub>20</sub> H <sub>32</sub> O <sub>4</sub> | 336.2301 | 3.31 | 359.2199 | 195.42 | 695.4500 | 279.51 |
| <b>53</b> | C <sub>22</sub> H <sub>34</sub> O <sub>5</sub> | 378.2406 | 3.57 | 401.2304 | 199.90 | 779.4710 | 291.28 |
| <b>55</b> | C <sub>20</sub> H <sub>32</sub> O <sub>4</sub> | 336.2301 | 3.95 | 359.2199 | 195.44 | 695.4500 | 260.55 |
| <b>56</b> | C <sub>22</sub> H <sub>34</sub> O <sub>5</sub> | 378.2406 | 4.57 | 401.2304 | 203.78 | 779.4710 | 274.81 |
| <b>57</b> | C <sub>21</sub> H <sub>32</sub> O <sub>5</sub> | 378.2406 | 3.93 | 401.2304 | 202.78 | 779.4710 | 308.20 |
| <b>59</b> | C <sub>20</sub> H <sub>30</sub> O <sub>5</sub> | 350.2093 | 3.14 | 373.1991 | 189.98 | 723.4084 | 263.24 |
| <b>61</b> | C <sub>20</sub> H <sub>32</sub> O <sub>6</sub> | 350.2093 | 3.16 | 373.1991 | 183.54 | 723.4084 | 253.98 |
| <b>62</b> | C <sub>20</sub> H <sub>30</sub> O <sub>5</sub> | 350.2093 | 3.08 | 373.1991 | 182.52 | 723.4084 | 253.24 |
| <b>65</b> | C <sub>22</sub> H <sub>32</sub> O <sub>5</sub> | 376.225  | 4.47 | 399.2148 | 204.02 | 775.4398 | 272.91 |
| <b>67</b> | C <sub>20</sub> H <sub>30</sub> O <sub>5</sub> | 350.2093 | 3.58 | 373.1991 | 189.93 | 723.4084 | 259.32 |
| <b>68</b> | C <sub>22</sub> H <sub>32</sub> O <sub>6</sub> | 392.2199 | 4.15 | 415.2097 | 200.30 | 807.4296 | 279.77 |
| <b>70</b> | C <sub>20</sub> H <sub>30</sub> O <sub>4</sub> | 334.2144 | 4.52 | 357.2042 | 190.28 | 691.4186 | 277.79 |
| <b>71</b> | C <sub>21</sub> H <sub>34</sub> O <sub>5</sub> | 366.2406 | 4.11 | 389.2304 | 201.72 | 755.4710 | 264.72 |
| <b>76</b> | C <sub>21</sub> H <sub>32</sub> O <sub>5</sub> | 364.225  | 3.82 | 387.2148 | 193.21 | 751.4398 | 265.81 |
| <b>77</b> | C <sub>23</sub> H <sub>34</sub> O <sub>6</sub> | 406.2355 | 4.40 | 429.2253 | 207.00 | 835.4608 | 282.76 |
| <b>78</b> | C <sub>23</sub> H <sub>38</sub> O <sub>4</sub> | 378.277  | 5.30 | 401.2668 | 209.74 | 779.5438 | 292.37 |
| <b>79</b> | C <sub>23</sub> H <sub>38</sub> O <sub>4</sub> | 378.277  | 5.97 | 401.2668 | 209.03 | 779.5438 | 279.56 |
| <b>80</b> | C <sub>20</sub> H <sub>34</sub> O <sub>4</sub> | 338.2457 | 3.98 | 361.2355 | 196.79 | 699.4812 | 260.65 |
| <b>81</b> | C <sub>22</sub> H <sub>36</sub> O <sub>5</sub> | 380.2563 | 4.58 | 403.2461 | 207.10 | 783.5024 | 276.35 |
| <b>82</b> | C <sub>20</sub> H <sub>34</sub> O <sub>5</sub> | 354.2406 | 3.08 | 377.2304 | 197.22 | 731.4710 | 266.68 |
| <b>83</b> | C <sub>20</sub> H <sub>32</sub> O <sub>5</sub> | 352.225  | 3.63 | 375.2148 | 196.29 | 727.4398 | 256.48 |

<sup>a</sup> The numbering of compounds was consistent with Chart S1.<sup>b</sup> The theoretical  $m/z$  are given as neutral species, i.e. the mass of an electron was not subtracted.



**Table S4.** Chromatographic, mass spectrometric, and ion mobility spectrometric information under negative ionization mode for aphidicolin compounds.

| No. <sup>a</sup> | Molecular formula                              | Monoisotopic mass | Observed RT (min) | [M-H] <sup>-</sup>             |                                | [2M-H] <sup>-</sup>            |                                |
|------------------|------------------------------------------------|-------------------|-------------------|--------------------------------|--------------------------------|--------------------------------|--------------------------------|
|                  |                                                |                   |                   | Theoretical $m/z$ <sup>b</sup> | Observed CCS (Å <sup>2</sup> ) | Theoretical $m/z$ <sup>b</sup> | Observed CCS (Å <sup>2</sup> ) |
| <b>2</b>         | C <sub>20</sub> H <sub>32</sub> O <sub>5</sub> | 352.2250          | 2.83              | 351.2172                       | 184.45                         | 703.4422                       | 253.04                         |
| <b>3</b>         | C <sub>22</sub> H <sub>34</sub> O <sub>6</sub> | 394.2355          | 3.12              | 393.2277                       | 200.28                         | -                              | -                              |
| <b>4</b>         | C <sub>20</sub> H <sub>32</sub> O <sub>4</sub> | 336.2301          | 3.06              | 335.2223                       | 182.92                         | 671.4524                       | 253.14                         |
| <b>6</b>         | C <sub>20</sub> H <sub>30</sub> O <sub>5</sub> | 350.2093          | 3.92              | 349.2015                       | 188.65                         | 699.4108                       | 273.93                         |
| <b>9</b>         | C <sub>23</sub> H <sub>36</sub> O <sub>5</sub> | 392.2563          | 4.29              | 391.2485                       | 198.57                         | 783.5048                       | 284.11                         |
| <b>10</b>        | C <sub>23</sub> H <sub>38</sub> O <sub>5</sub> | 394.2719          | 3.92              | 393.2641                       | 200.72                         | 787.5360                       | 286.52                         |
| <b>11</b>        | C <sub>23</sub> H <sub>36</sub> O <sub>6</sub> | 408.2512          | 4.15              | 407.2434                       | 203.31                         | 815.4946                       | 301.68                         |
| <b>13</b>        | C <sub>23</sub> H <sub>36</sub> O <sub>5</sub> | 392.2563          | 5.17              | 391.2485                       | 201.20                         | 783.5048                       | 290.76                         |
| <b>14</b>        | C <sub>20</sub> H <sub>32</sub> O <sub>5</sub> | 352.2250          | 3.35              | 351.2172                       | 183.02                         | 703.4422                       | 254.70                         |
| <b>16</b>        | C <sub>22</sub> H <sub>34</sub> O <sub>6</sub> | 394.2355          | 3.82              | 393.2277                       | 197.30                         | 787.4632                       | 271.57                         |
| <b>17</b>        | C <sub>20</sub> H <sub>30</sub> O <sub>5</sub> | 350.2093          | 3.35              | 349.2015                       | 183.40                         | 699.4108                       | 254.32                         |
| <b>19</b>        | C <sub>22</sub> H <sub>36</sub> O <sub>6</sub> | 396.2512          | 3.45              | 395.2434                       | 200.26                         | 791.4946                       | 276.54                         |
| <b>20</b>        | C <sub>22</sub> H <sub>34</sub> O <sub>6</sub> | 394.2355          | 4.31              | 393.2277                       | 201.16                         | 787.4632                       | 285.53                         |
| <b>21</b>        | C <sub>20</sub> H <sub>30</sub> O <sub>6</sub> | 366.2042          | 3.98              | 365.1964                       | 188.21                         | 731.4006                       | 264.19                         |
| <b>22</b>        | C <sub>22</sub> H <sub>36</sub> O <sub>6</sub> | 396.2512          | 3.85              | 395.2434                       | 198.26                         | 791.4946                       | 273.06                         |
| <b>23</b>        | C <sub>20</sub> H <sub>32</sub> O <sub>6</sub> | 368.2199          | 3.17              | 367.2121                       | 190.04                         | 735.4320                       | 261.59                         |
| <b>24</b>        | C <sub>20</sub> H <sub>34</sub> O <sub>5</sub> | 354.2406          | 3.82              | 353.2328                       | 183.37                         | 707.4734                       | 261.04                         |
| <b>25</b>        | C <sub>22</sub> H <sub>36</sub> O <sub>6</sub> | 396.2512          | 4.36              | 395.2434                       | 194.45                         | 791.4946                       | 281.75                         |
| <b>26</b>        | C <sub>22</sub> H <sub>34</sub> O <sub>7</sub> | 396.2512          | 3.80              | 395.2434                       | 199.50                         | 791.4946                       | 271.22                         |
| <b>27</b>        | C <sub>22</sub> H <sub>36</sub> O <sub>6</sub> | 396.2512          | 3.50              | 395.2434                       | 200.33                         | 791.4946                       | 273.21                         |
| <b>28</b>        | C <sub>20</sub> H <sub>32</sub> O <sub>4</sub> | 336.2301          | 3.78              | 335.2223                       | 183.66                         | 671.4524                       | 254.82                         |
| <b>32</b>        | C <sub>20</sub> H <sub>32</sub> O <sub>5</sub> | 352.2250          | 3.23              | 351.2172                       | 186.63                         | 703.4422                       | 261.03                         |
| <b>33</b>        | C <sub>20</sub> H <sub>32</sub> O <sub>5</sub> | 352.2250          | 3.64              | 351.2172                       | 186.25                         | 703.4422                       | 259.02                         |
| <b>36</b>        | C <sub>20</sub> H <sub>32</sub> O <sub>5</sub> | 352.2250          | 3.31              | 351.2172                       | 182.54                         | 703.4422                       | 246.63                         |
| <b>37</b>        | C <sub>22</sub> H <sub>34</sub> O <sub>6</sub> | 394.2355          | 3.23              | 393.2277                       | 199.50                         | 787.4632                       | 275.48                         |
| <b>44</b>        | C <sub>20</sub> H <sub>30</sub> O <sub>4</sub> | 334.2144          | 3.56              | 333.2066                       | 180.16                         | 667.4210                       | 269.28                         |
| <b>45</b>        | C <sub>20</sub> H <sub>30</sub> O <sub>5</sub> | 350.2093          | 3.52              | 349.2015                       | 185.21                         | 699.4108                       | 261.72                         |
| <b>46</b>        | C <sub>22</sub> H <sub>32</sub> O <sub>6</sub> | 392.2199          | 4.01              | 391.2121                       | 200.24                         | -                              | -                              |
| <b>48</b>        | C <sub>22</sub> H <sub>32</sub> O <sub>5</sub> | 376.2250          | 4.29              | 375.2172                       | 196.60                         | 751.4422                       | 275.08                         |
| <b>49</b>        | C <sub>20</sub> H <sub>32</sub> O <sub>5</sub> | 352.2250          | 2.85              | 351.2172                       | 185.99                         | 703.4422                       | 259.48                         |

**Table S4.** (*cont.*)

|           |                                                |          |      |          |        |          |        |
|-----------|------------------------------------------------|----------|------|----------|--------|----------|--------|
| <b>50</b> | C <sub>22</sub> H <sub>34</sub> O <sub>6</sub> | 394.2355 | 3.09 | 393.2277 | 200.34 | 787.4632 | 275.87 |
| <b>51</b> | C <sub>20</sub> H <sub>32</sub> O <sub>4</sub> | 336.2301 | 2.91 | 335.2223 | 183.68 | 671.4524 | 256.21 |
| <b>52</b> | C <sub>20</sub> H <sub>32</sub> O <sub>4</sub> | 336.2301 | 3.36 | 335.2223 | 185.16 | 671.4524 | 278.96 |
| <b>55</b> | C <sub>20</sub> H <sub>32</sub> O <sub>4</sub> | 336.2301 | 3.89 | 335.2223 | 184.25 | 671.4524 | 254.98 |
| <b>56</b> | C <sub>22</sub> H <sub>34</sub> O <sub>5</sub> | 378.2406 | 4.52 | 377.2328 | 197.70 | 755.4734 | 272.22 |
| <b>57</b> | C <sub>21</sub> H <sub>32</sub> O <sub>5</sub> | 378.2406 | 3.94 | 377.2328 | 196.65 | 755.4734 | 282.37 |
| <b>58</b> | C <sub>20</sub> H <sub>30</sub> O <sub>5</sub> | 350.2093 | 4.05 | 349.2015 | 187.73 | 699.4108 | 264.23 |
| <b>59</b> | C <sub>20</sub> H <sub>30</sub> O <sub>5</sub> | 350.2093 | 3.20 | 349.2015 | 181.38 | -        | -      |
| <b>61</b> | C <sub>20</sub> H <sub>32</sub> O <sub>6</sub> | 350.2093 | 3.15 | 349.2015 | 182.08 | -        | -      |
| <b>62</b> | C <sub>20</sub> H <sub>30</sub> O <sub>5</sub> | 350.2093 | 3.17 | 349.2015 | 181.98 | 699.4108 | 253.00 |
| <b>63</b> | C <sub>20</sub> H <sub>32</sub> O <sub>4</sub> | 318.2195 | 4.24 | 317.2117 | 180.49 | 635.4312 | 255.55 |
| <b>65</b> | C <sub>22</sub> H <sub>32</sub> O <sub>5</sub> | 376.2250 | 4.48 | 375.2172 | 194.50 | -        | -      |
| <b>66</b> | C <sub>20</sub> H <sub>28</sub> O <sub>5</sub> | 348.1937 | 4.04 | 347.1859 | 185.55 | 695.3796 | 278.24 |
| <b>67</b> | C <sub>20</sub> H <sub>30</sub> O <sub>5</sub> | 350.2093 | 3.60 | 349.2015 | 183.28 | 699.4108 | 252.01 |
| <b>68</b> | C <sub>22</sub> H <sub>32</sub> O <sub>6</sub> | 392.2199 | 4.19 | 391.2121 | 199.08 | 783.4320 | 276.21 |
| <b>69</b> | C <sub>20</sub> H <sub>28</sub> O <sub>4</sub> | 332.1988 | 3.98 | 331.1910 | 181.82 | 663.3898 | 265.64 |
| <b>70</b> | C <sub>20</sub> H <sub>30</sub> O <sub>4</sub> | 334.2144 | 4.59 | 333.2066 | 180.07 | 667.4210 | 264.63 |
| <b>71</b> | C <sub>21</sub> H <sub>34</sub> O <sub>5</sub> | 366.2406 | 4.10 | 365.2328 | 194.82 | 731.4734 | 269.67 |
| <b>72</b> | C <sub>19</sub> H <sub>28</sub> O <sub>4</sub> | 320.1988 | 3.20 | 319.1910 | 177.95 | 639.3898 | 265.57 |
| <b>73</b> | C <sub>19</sub> H <sub>26</sub> O <sub>4</sub> | 318.1831 | 3.43 | 317.1753 | 177.27 | 635.3584 | 257.22 |
| <b>74</b> | C <sub>21</sub> H <sub>28</sub> O <sub>5</sub> | 360.1937 | 4.06 | 359.1859 | 192.38 | 719.3796 | 270.92 |
| <b>75</b> | C <sub>19</sub> H <sub>28</sub> O <sub>4</sub> | 320.1988 | 3.11 | 319.1910 | 178.47 | -        | -      |
| <b>76</b> | C <sub>21</sub> H <sub>32</sub> O <sub>5</sub> | 364.2250 | 3.81 | 363.2172 | 195.64 | 727.4422 | 281.57 |
| <b>77</b> | C <sub>23</sub> H <sub>34</sub> O <sub>6</sub> | 406.2355 | 4.41 | 405.2277 | 200.54 | -        | -      |
| <b>78</b> | C <sub>23</sub> H <sub>38</sub> O <sub>4</sub> | 378.2770 | 5.28 | 377.2692 | 200.31 | 755.5462 | 285.68 |
| <b>79</b> | C <sub>23</sub> H <sub>38</sub> O <sub>4</sub> | 378.2770 | 5.91 | 377.2692 | 199.89 | 755.5462 | 271.65 |
| <b>80</b> | C <sub>20</sub> H <sub>34</sub> O <sub>4</sub> | 338.2457 | 3.97 | 337.2379 | 184.55 | 675.4836 | 254.28 |
| <b>81</b> | C <sub>22</sub> H <sub>36</sub> O <sub>5</sub> | 380.2563 | 4.59 | 379.2485 | 199.22 | 759.5048 | 272.31 |
| <b>82</b> | C <sub>20</sub> H <sub>34</sub> O <sub>5</sub> | 354.2406 | 3.04 | 353.2328 | 185.69 | 707.4734 | 258.72 |
| <b>83</b> | C <sub>20</sub> H <sub>32</sub> O <sub>5</sub> | 352.2250 | 3.65 | 351.2172 | 186.74 | 703.4422 | 267.55 |
| <b>84</b> | C <sub>20</sub> H <sub>34</sub> O <sub>5</sub> | 354.2406 | 3.09 | 353.2328 | 185.92 | -        | -      |

<sup>a</sup> The numbering of compounds was consistent with Chart S1.<sup>b</sup> The theoretical  $m/z$  are given as neutral species, i.e. the mass of an electron was not accounted for.

**Table S5.** Chromatographic, mass spectrometric, and ion mobility spectrometric information for the sodium adducts of aphidicolin isomers.

| No. <sup>a</sup> | Molecular formula                              | Monoisotopic mass | Theoretical $m/z$ <sup>b</sup> | Observed RT (min) | Observed drift (ms) | Observed CCS ( $\text{\AA}^2$ ) |
|------------------|------------------------------------------------|-------------------|--------------------------------|-------------------|---------------------|---------------------------------|
| <b>44</b>        | C <sub>20</sub> H <sub>30</sub> O <sub>4</sub> | 334.2144          | 357.2042                       | 3.57              | 5.83                | 183.70                          |
| <b>70</b>        | C <sub>20</sub> H <sub>30</sub> O <sub>4</sub> | 334.2144          | 357.2042                       | 4.52              | 6.17                | 190.28                          |
| <b>41</b>        | C <sub>20</sub> H <sub>32</sub> O <sub>4</sub> | 336.2301          | 359.2199                       | 3.80              | 5.93                | 186.07                          |
| <b>28</b>        | C <sub>20</sub> H <sub>32</sub> O <sub>4</sub> | 336.2301          | 359.2199                       | 3.83              | 5.99                | 187.61                          |
| <b>51</b>        | C <sub>20</sub> H <sub>32</sub> O <sub>4</sub> | 336.2301          | 359.2199                       | 3.02              | 6.22                | 193.46                          |
| <b>52</b>        | C <sub>20</sub> H <sub>32</sub> O <sub>4</sub> | 336.2301          | 359.2199                       | 3.31              | 6.37                | 195.42                          |
| <b>55</b>        | C <sub>20</sub> H <sub>32</sub> O <sub>4</sub> | 336.2301          | 359.2199                       | 3.95              | 6.29                | 195.44                          |
| <b>31</b>        | C <sub>20</sub> H <sub>30</sub> O <sub>5</sub> | 350.2093          | 373.1991                       | 3.81              | 5.76                | 179.88                          |
| <b>62</b>        | C <sub>20</sub> H <sub>30</sub> O <sub>5</sub> | 350.2093          | 373.1991                       | 3.08              | 5.87                | 182.52                          |
| <b>61</b>        | C <sub>20</sub> H <sub>30</sub> O <sub>5</sub> | 350.2093          | 373.1991                       | 3.16              | 5.83                | 183.54                          |
| <b>67</b>        | C <sub>20</sub> H <sub>30</sub> O <sub>5</sub> | 350.2093          | 373.1991                       | 3.58              | 6.16                | 189.93                          |
| <b>59</b>        | C <sub>20</sub> H <sub>30</sub> O <sub>5</sub> | 350.2093          | 373.1991                       | 3.14              | 6.16                | 189.98                          |
| <b>17</b>        | C <sub>20</sub> H <sub>30</sub> O <sub>5</sub> | 350.2093          | 373.1991                       | 3.37              | 6.17                | 192.05                          |
| <b>15</b>        | C <sub>20</sub> H <sub>30</sub> O <sub>5</sub> | 350.2093          | 373.1991                       | 3.22              | 6.33                | 196.19                          |
| <b>45</b>        | C <sub>20</sub> H <sub>30</sub> O <sub>5</sub> | 350.2093          | 373.1991                       | 3.54              | 6.35                | 196.79                          |
| <b>33</b>        | C <sub>20</sub> H <sub>32</sub> O <sub>5</sub> | 352.2250          | 375.2148                       | 3.65              | 5.88                | 184.77                          |
| <b>36</b>        | C <sub>20</sub> H <sub>32</sub> O <sub>5</sub> | 352.2250          | 375.2148                       | 3.38              | 6.01                | 186.00                          |
| <b>32</b>        | C <sub>20</sub> H <sub>32</sub> O <sub>5</sub> | 352.2250          | 375.2148                       | 3.29              | 6.17                | 192.10                          |
| <b>14</b>        | C <sub>20</sub> H <sub>32</sub> O <sub>5</sub> | 352.2250          | 375.2148                       | 3.32              | 6.28                | 195.01                          |
| <b>83</b>        | C <sub>20</sub> H <sub>32</sub> O <sub>5</sub> | 352.2250          | 375.2148                       | 3.63              | 6.33                | 196.29                          |
| <b>24</b>        | C <sub>20</sub> H <sub>34</sub> O <sub>5</sub> | 354.2406          | 377.2304                       | 3.88              | 5.88                | 184.74                          |
| <b>82</b>        | C <sub>20</sub> H <sub>34</sub> O <sub>5</sub> | 354.2406          | 377.2304                       | 3.08              | 6.37                | 197.22                          |
| <b>48</b>        | C <sub>22</sub> H <sub>32</sub> O <sub>5</sub> | 376.2250          | 399.2148                       | 4.30              | 6.56                | 202.13                          |
| <b>42</b>        | C <sub>22</sub> H <sub>32</sub> O <sub>5</sub> | 376.2250          | 399.2148                       | 4.48              | 6.68                | 203.07                          |
| <b>65</b>        | C <sub>22</sub> H <sub>32</sub> O <sub>5</sub> | 376.2250          | 399.2148                       | 4.47              | 6.63                | 204.02                          |

**Table S5.** (*cont.*)

|    |                                                |          |          |      |      |        |
|----|------------------------------------------------|----------|----------|------|------|--------|
| 1  | C <sub>22</sub> H <sub>34</sub> O <sub>5</sub> | 378.2406 | 401.2304 | 4.27 | 6.05 | 188.86 |
| 53 | C <sub>22</sub> H <sub>34</sub> O <sub>5</sub> | 378.2406 | 401.2304 | 3.57 | 6.56 | 199.90 |
| 57 | C <sub>22</sub> H <sub>34</sub> O <sub>5</sub> | 378.2406 | 401.2304 | 3.93 | 6.59 | 202.78 |
| 30 | C <sub>22</sub> H <sub>34</sub> O <sub>5</sub> | 378.2406 | 401.2304 | 4.29 | 6.62 | 203.49 |
| 56 | C <sub>22</sub> H <sub>34</sub> O <sub>5</sub> | 378.2406 | 401.2304 | 4.57 | 6.63 | 203.78 |
| 79 | C <sub>23</sub> H <sub>38</sub> O <sub>4</sub> | 378.2770 | 401.2668 | 5.97 | 6.82 | 209.03 |
| 78 | C <sub>23</sub> H <sub>38</sub> O <sub>4</sub> | 378.2770 | 401.2668 | 5.30 | 6.85 | 209.74 |
| 40 | C <sub>22</sub> H <sub>32</sub> O <sub>6</sub> | 392.2199 | 415.2097 | 3.41 | 6.43 | 196.53 |
| 68 | C <sub>22</sub> H <sub>32</sub> O <sub>6</sub> | 392.2199 | 415.2097 | 4.15 | 6.58 | 200.30 |
| 46 | C <sub>22</sub> H <sub>32</sub> O <sub>6</sub> | 392.2199 | 415.2097 | 4.08 | 6.77 | 205.21 |
|    |                                                |          |          |      |      | 0.00   |
| 13 | C <sub>23</sub> H <sub>36</sub> O <sub>5</sub> | 392.2563 | 415.2461 | 5.01 | 6.73 | 206.52 |
| 12 | C <sub>23</sub> H <sub>36</sub> O <sub>5</sub> | 392.2563 | 415.2461 | 3.98 | 6.85 | 209.75 |
| 38 | C <sub>22</sub> H <sub>34</sub> O <sub>6</sub> | 394.2355 | 417.2253 | 3.82 | 6.34 | 196.22 |
| 50 | C <sub>22</sub> H <sub>34</sub> O <sub>6</sub> | 394.2355 | 417.2253 | 3.05 | 6.45 | 197.06 |
| 37 | C <sub>22</sub> H <sub>34</sub> O <sub>6</sub> | 394.2355 | 417.2253 | 3.21 | 6.39 | 197.53 |
| 34 | C <sub>22</sub> H <sub>34</sub> O <sub>6</sub> | 394.2355 | 417.2253 | 4.28 | 6.42 | 198.25 |
| 3  | C <sub>22</sub> H <sub>34</sub> O <sub>6</sub> | 394.2355 | 417.2253 | 3.14 | 6.63 | 203.73 |
| 20 | C <sub>22</sub> H <sub>34</sub> O <sub>6</sub> | 394.2355 | 417.2253 | 4.48 | 6.72 | 206.14 |
| 16 | C <sub>22</sub> H <sub>34</sub> O <sub>6</sub> | 394.2355 | 417.2253 | 3.82 | 6.74 | 206.80 |
| 22 | C <sub>22</sub> H <sub>36</sub> O <sub>6</sub> | 396.2512 | 419.2410 | 3.95 | 6.36 | 196.56 |
| 25 | C <sub>22</sub> H <sub>36</sub> O <sub>6</sub> | 396.2512 | 419.2410 | 4.39 | 6.40 | 197.80 |
| 26 | C <sub>22</sub> H <sub>36</sub> O <sub>6</sub> | 396.2512 | 419.2410 | 3.82 | 6.48 | 199.72 |
| 19 | C <sub>22</sub> H <sub>36</sub> O <sub>6</sub> | 396.2512 | 419.2410 | 3.31 | 6.84 | 207.18 |
| 18 | C <sub>22</sub> H <sub>36</sub> O <sub>6</sub> | 396.2512 | 419.2410 | 3.49 | 6.77 | 207.35 |
| 27 | C <sub>22</sub> H <sub>36</sub> O <sub>6</sub> | 396.2512 | 419.2410 | 3.56 | 6.78 | 207.86 |

<sup>a</sup> The numbering of compounds was consistent with Chart S1.

<sup>b</sup> The theoretical  $m/z$  are given as neutral species, i.e. the mass of an electron was not subtracted.

**Table S6.** Chromatographic, mass spectrometric, and ion mobility spectrometric information for the deprotonated molecules of aphidicolin isomers.

| No. <sup>a</sup> | Molecular<br>formula                           | Monoisotopic<br>mass | $m/z$ <sup>b</sup> | Observed<br>RT (min) | Observed<br>drift (ms) | Observed CCS<br>(Å <sup>2</sup> ) |
|------------------|------------------------------------------------|----------------------|--------------------|----------------------|------------------------|-----------------------------------|
| <b>75</b>        | C <sub>19</sub> H <sub>28</sub> O <sub>4</sub> | 320.1988             | 319.1910           | 3.11                 | 5.70                   | 178.47                            |
| <b>72</b>        | C <sub>19</sub> H <sub>28</sub> O <sub>4</sub> | 320.1988             | 319.1910           | 3.20                 | 5.68                   | 177.95                            |
| <b>70</b>        | C <sub>20</sub> H <sub>30</sub> O <sub>4</sub> | 334.2144             | 333.2066           | 4.59                 | 5.77                   | 180.07                            |
| <b>44</b>        | C <sub>20</sub> H <sub>30</sub> O <sub>4</sub> | 334.2144             | 333.2066           | 3.56                 | 5.77                   | 180.16                            |
| <b>28</b>        | C <sub>20</sub> H <sub>32</sub> O <sub>4</sub> | 336.2301             | 335.2223           | 3.78                 | 5.92                   | 183.66                            |
| <b>51</b>        | C <sub>20</sub> H <sub>32</sub> O <sub>4</sub> | 336.2301             | 335.2223           | 2.91                 | 5.92                   | 183.68                            |
| <b>4</b>         | C <sub>20</sub> H <sub>32</sub> O <sub>4</sub> | 336.2301             | 335.2223           | 3.06                 | 5.89                   | 182.92                            |
| <b>55</b>        | C <sub>20</sub> H <sub>32</sub> O <sub>4</sub> | 336.2301             | 335.2223           | 3.89                 | 5.94                   | 184.25                            |
| <b>52</b>        | C <sub>20</sub> H <sub>32</sub> O <sub>4</sub> | 336.2301             | 335.2223           | 3.36                 | 5.98                   | 185.16                            |
| <b>59</b>        | C <sub>20</sub> H <sub>30</sub> O <sub>5</sub> | 350.2093             | 349.2015           | 3.20                 | 5.83                   | 181.38                            |
| <b>58</b>        | C <sub>20</sub> H <sub>30</sub> O <sub>5</sub> | 350.2093             | 349.2015           | 4.05                 | 6.09                   | 187.73                            |
| <b>6</b>         | C <sub>20</sub> H <sub>30</sub> O <sub>5</sub> | 350.2093             | 349.2015           | 3.92                 | 6.12                   | 188.65                            |
| <b>62</b>        | C <sub>20</sub> H <sub>30</sub> O <sub>5</sub> | 350.2093             | 349.2015           | 3.17                 | 5.85                   | 181.98                            |
| <b>17</b>        | C <sub>20</sub> H <sub>30</sub> O <sub>5</sub> | 350.2093             | 349.2015           | 3.35                 | 5.91                   | 183.40                            |
| <b>45</b>        | C <sub>20</sub> H <sub>30</sub> O <sub>5</sub> | 350.2093             | 349.2015           | 3.52                 | 5.98                   | 185.21                            |
| <b>67</b>        | C <sub>20</sub> H <sub>30</sub> O <sub>5</sub> | 350.2093             | 349.2015           | 3.60                 | 5.91                   | 183.28                            |
| <b>61</b>        | C <sub>20</sub> H <sub>30</sub> O <sub>5</sub> | 350.2093             | 349.2015           | 3.15                 | 5.86                   | 182.08                            |
| <b>14</b>        | C <sub>20</sub> H <sub>32</sub> O <sub>5</sub> | 352.2250             | 351.2172           | 3.35                 | 5.90                   | 183.02                            |
| <b>49</b>        | C <sub>20</sub> H <sub>32</sub> O <sub>5</sub> | 352.2250             | 351.2172           | 2.85                 | 6.02                   | 185.99                            |
| <b>33</b>        | C <sub>20</sub> H <sub>32</sub> O <sub>5</sub> | 352.2250             | 351.2172           | 3.64                 | 6.03                   | 186.25                            |
| <b>36</b>        | C <sub>20</sub> H <sub>32</sub> O <sub>5</sub> | 352.2250             | 351.2172           | 3.31                 | 5.88                   | 182.54                            |
| <b>2</b>         | C <sub>20</sub> H <sub>32</sub> O <sub>5</sub> | 352.2250             | 351.2172           | 2.83                 | 5.95                   | 184.45                            |
| <b>83</b>        | C <sub>20</sub> H <sub>32</sub> O <sub>5</sub> | 352.2250             | 351.2172           | 3.65                 | 6.05                   | 186.74                            |
| <b>32</b>        | C <sub>20</sub> H <sub>32</sub> O <sub>5</sub> | 352.2250             | 351.2172           | 3.23                 | 6.04                   | 186.63                            |
| <b>82</b>        | C <sub>20</sub> H <sub>34</sub> O <sub>5</sub> | 354.2406             | 353.2328           | 3.04                 | 6.00                   | 185.69                            |
| <b>24</b>        | C <sub>20</sub> H <sub>34</sub> O <sub>5</sub> | 354.2406             | 353.2328           | 3.82                 | 5.91                   | 183.37                            |
| <b>84</b>        | C <sub>20</sub> H <sub>34</sub> O <sub>5</sub> | 354.2406             | 353.2328           | 3.09                 | 6.01                   | 185.92                            |

**Table S6.** (*cont.*)

|           |                                                |          |          |      |      |        |
|-----------|------------------------------------------------|----------|----------|------|------|--------|
| <b>65</b> | C <sub>22</sub> H <sub>32</sub> O <sub>5</sub> | 376.2250 | 375.2172 | 4.48 | 6.37 | 194.50 |
| <b>48</b> | C <sub>22</sub> H <sub>32</sub> O <sub>5</sub> | 376.2250 | 375.2172 | 4.29 | 6.45 | 196.60 |
| <b>56</b> | C <sub>22</sub> H <sub>34</sub> O <sub>5</sub> | 378.2406 | 377.2328 | 4.52 | 6.50 | 197.70 |
| <b>57</b> | C <sub>22</sub> H <sub>34</sub> O <sub>5</sub> | 378.2406 | 377.2328 | 3.94 | 6.45 | 196.65 |
| <b>78</b> | C <sub>23</sub> H <sub>38</sub> O <sub>4</sub> | 378.2770 | 377.2692 | 5.28 | 6.60 | 200.31 |
| <b>79</b> | C <sub>23</sub> H <sub>38</sub> O <sub>4</sub> | 378.2770 | 377.2692 | 5.91 | 6.58 | 199.89 |
| <b>68</b> | C <sub>22</sub> H <sub>32</sub> O <sub>6</sub> | 392.2199 | 391.2121 | 4.19 | 6.55 | 199.08 |
| <b>46</b> | C <sub>22</sub> H <sub>32</sub> O <sub>6</sub> | 392.2199 | 391.2121 | 4.01 | 6.60 | 200.24 |
| <b>9</b>  | C <sub>23</sub> H <sub>36</sub> O <sub>5</sub> | 392.2563 | 391.2485 | 4.29 | 6.53 | 198.57 |
| <b>13</b> | C <sub>23</sub> H <sub>36</sub> O <sub>5</sub> | 392.2563 | 391.2485 | 5.17 | 6.64 | 201.20 |
| <b>37</b> | C <sub>22</sub> H <sub>34</sub> O <sub>6</sub> | 394.2355 | 393.2277 | 3.23 | 6.57 | 199.50 |
| <b>16</b> | C <sub>22</sub> H <sub>34</sub> O <sub>6</sub> | 394.2355 | 393.2277 | 3.82 | 6.48 | 197.30 |
| <b>20</b> | C <sub>22</sub> H <sub>34</sub> O <sub>6</sub> | 394.2355 | 393.2277 | 4.31 | 6.64 | 201.16 |
| <b>50</b> | C <sub>22</sub> H <sub>34</sub> O <sub>6</sub> | 394.2355 | 393.2277 | 3.09 | 6.60 | 200.34 |
| <b>3</b>  | C <sub>22</sub> H <sub>34</sub> O <sub>6</sub> | 394.2355 | 393.2277 | 3.12 | 6.60 | 200.28 |
| <b>22</b> | C <sub>22</sub> H <sub>36</sub> O <sub>6</sub> | 396.2512 | 395.2434 | 3.85 | 6.52 | 198.26 |
| <b>25</b> | C <sub>22</sub> H <sub>36</sub> O <sub>6</sub> | 396.2512 | 395.2434 | 4.36 | 6.37 | 194.45 |
| <b>19</b> | C <sub>22</sub> H <sub>36</sub> O <sub>6</sub> | 396.2512 | 395.2434 | 3.45 | 6.60 | 200.26 |
| <b>27</b> | C <sub>22</sub> H <sub>36</sub> O <sub>6</sub> | 396.2512 | 395.2434 | 3.50 | 6.60 | 200.33 |
| <b>26</b> | C <sub>22</sub> H <sub>36</sub> O <sub>6</sub> | 396.2512 | 395.2434 | 3.80 | 6.57 | 199.50 |

<sup>a</sup> The numbering of compounds was consistent with Chart S1.

<sup>b</sup> The theoretical  $m/z$  are given as neutral species, i.e. the mass of an electron was not accounted for.

**Table S7.** The relative differences of CCS values for aphidicolin isomers (sodium adducts) which showed RT (retention time) differences less than 0.1 min.

| No. <sup>a</sup> | Molecular formula                              | Theoretical $m/z$ <sup>b</sup> | Observed RT (min) | Observed CCS (Å <sup>2</sup> ) | ΔRT (min) | ΔCCS  |
|------------------|------------------------------------------------|--------------------------------|-------------------|--------------------------------|-----------|-------|
| <b>1</b>         | C <sub>22</sub> H <sub>34</sub> O <sub>5</sub> | 401.2304                       | 4.27              | 188.86                         | 0.02      | 7.75% |
| <b>30</b>        | C <sub>22</sub> H <sub>34</sub> O <sub>5</sub> | 401.2304                       | 4.29              | 203.49                         |           |       |
| <b>3</b>         | C <sub>22</sub> H <sub>34</sub> O <sub>6</sub> | 417.2253                       | 3.14              | 203.73                         | 0.07      | 3.14% |
| <b>37</b>        | C <sub>22</sub> H <sub>34</sub> O <sub>6</sub> | 417.2253                       | 3.21              | 197.53                         |           |       |
| <b>3</b>         | C <sub>22</sub> H <sub>34</sub> O <sub>6</sub> | 417.2253                       | 3.14              | 203.73                         | 0.09      | 3.39% |
| <b>50</b>        | C <sub>22</sub> H <sub>34</sub> O <sub>6</sub> | 417.2253                       | 3.05              | 197.06                         |           |       |
| <b>14</b>        | C <sub>20</sub> H <sub>32</sub> O <sub>5</sub> | 375.2148                       | 3.32              | 195.01                         | 0.03      | 1.52% |
| <b>32</b>        | C <sub>20</sub> H <sub>32</sub> O <sub>5</sub> | 375.2148                       | 3.29              | 192.10                         |           |       |
| <b>14</b>        | C <sub>20</sub> H <sub>32</sub> O <sub>5</sub> | 375.2148                       | 3.32              | 195.01                         | 0.06      | 4.85% |
| <b>36</b>        | C <sub>20</sub> H <sub>32</sub> O <sub>5</sub> | 375.2148                       | 3.38              | 186.00                         |           |       |
| <b>15</b>        | C <sub>20</sub> H <sub>30</sub> O <sub>5</sub> | 373.1991                       | 3.22              | 196.19                         | 0.08      | 3.27% |
| <b>59</b>        | C <sub>20</sub> H <sub>30</sub> O <sub>5</sub> | 373.1991                       | 3.14              | 189.98                         |           |       |
| <b>15</b>        | C <sub>20</sub> H <sub>30</sub> O <sub>5</sub> | 373.1991                       | 3.22              | 196.19                         | 0.06      | 6.89% |
| <b>61</b>        | C <sub>20</sub> H <sub>30</sub> O <sub>5</sub> | 373.1991                       | 3.16              | 183.54                         |           |       |
| <b>16</b>        | C <sub>22</sub> H <sub>34</sub> O <sub>6</sub> | 417.2253                       | 3.82              | 206.80                         | 0.00      | 5.39% |
| <b>38</b>        | C <sub>22</sub> H <sub>34</sub> O <sub>6</sub> | 417.2253                       | 3.82              | 196.22                         |           |       |
| <b>18</b>        | C <sub>22</sub> H <sub>36</sub> O <sub>6</sub> | 419.2410                       | 3.49              | 207.35                         | 0.07      | 0.25% |
| <b>27</b>        | C <sub>22</sub> H <sub>36</sub> O <sub>6</sub> | 419.2410                       | 3.56              | 207.86                         |           |       |
| <b>28</b>        | C <sub>20</sub> H <sub>32</sub> O <sub>4</sub> | 359.2199                       | 3.83              | 187.61                         | 0.03      | 0.83% |
| <b>41</b>        | C <sub>20</sub> H <sub>32</sub> O <sub>4</sub> | 359.2199                       | 3.80              | 186.07                         |           |       |
| <b>32</b>        | C <sub>20</sub> H <sub>32</sub> O <sub>5</sub> | 375.2148                       | 3.29              | 192.10                         | 0.09      | 3.28% |
| <b>36</b>        | C <sub>20</sub> H <sub>32</sub> O <sub>5</sub> | 375.2148                       | 3.38              | 186.00                         |           |       |
| <b>33</b>        | C <sub>20</sub> H <sub>32</sub> O <sub>5</sub> | 375.2148                       | 3.65              | 184.77                         | 0.01      | 6.23% |
| <b>83</b>        | C <sub>20</sub> H <sub>32</sub> O <sub>5</sub> | 375.2148                       | 3.63              | 196.29                         |           |       |

**Table S7.** (*cont.*)

|           |                                                |          |      |        |      |       |
|-----------|------------------------------------------------|----------|------|--------|------|-------|
| <b>42</b> | C <sub>22</sub> H <sub>32</sub> O <sub>5</sub> | 399.2148 | 4.48 | 203.07 | 0.00 | 0.47% |
| <b>65</b> | C <sub>22</sub> H <sub>32</sub> O <sub>5</sub> | 399.2148 | 4.47 | 204.02 |      |       |
| <b>45</b> | C <sub>20</sub> H <sub>30</sub> O <sub>5</sub> | 373.1991 | 3.54 | 196.79 | 0.04 | 3.61% |
| <b>67</b> | C <sub>20</sub> H <sub>30</sub> O <sub>5</sub> | 373.1991 | 3.58 | 189.93 |      |       |
| <b>46</b> | C <sub>22</sub> H <sub>32</sub> O <sub>6</sub> | 415.2097 | 4.08 | 205.21 | 0.08 | 2.46% |
| <b>68</b> | C <sub>22</sub> H <sub>32</sub> O <sub>6</sub> | 415.2097 | 4.15 | 200.30 |      |       |
| <b>59</b> | C <sub>20</sub> H <sub>30</sub> O <sub>5</sub> | 373.1991 | 3.14 | 189.98 | 0.07 | 4.08% |
| <b>62</b> | C <sub>20</sub> H <sub>30</sub> O <sub>5</sub> | 373.1991 | 3.08 | 182.52 |      |       |
| <b>59</b> | C <sub>20</sub> H <sub>30</sub> O <sub>5</sub> | 373.1991 | 3.14 | 189.98 | 0.02 | 3.50% |
| <b>61</b> | C <sub>20</sub> H <sub>30</sub> O <sub>5</sub> | 373.1991 | 3.16 | 183.54 |      |       |
| <b>61</b> | C <sub>20</sub> H <sub>30</sub> O <sub>5</sub> | 373.1991 | 3.16 | 183.54 | 0.08 | 0.56% |
| <b>62</b> | C <sub>20</sub> H <sub>30</sub> O <sub>5</sub> | 373.1991 | 3.08 | 182.52 |      |       |

<sup>a</sup> The numbering of compounds was consistent with Chart S1.

<sup>b</sup> The theoretical  $m/z$  are given as neutral species, i.e. the mass of an electron was not subtracted.

## Reference:

1. Ross, D. H.; Cho, J. H.; Xu, L., Breaking down Structural Diversity for Comprehensive Prediction of Ion-Neutral Collision Cross Sections. *Analytical Chemistry* **2020**, 92, 4548-4557.
